# Supplementary material
Source: publisher figshare collection journal article supplement (https://gsajournals.figshare.com/ndownloader/files/13879007)
Supplement: Supplementary file 1 [file 13879007]

Table S11 List of single-copy core genes of 21 selected *Mycoplasma* strains

| Locusa | Producta | Genea | Protein length (aa)a | Positiona |
| --- | --- | --- | --- | --- |
| M.dispar-GS01_GM000023 | glyceraldehyde 3-phosphate dehydrogenase | *gapA* | 336 | 27739…28749 |
| M.dispar-GS01_GM000045 | ATP synthase beta chain | *atpD* | 471 | 47774…49189 |
| M.dispar-GS01_GM000066 | Heat shock protein 70 | *dnaK* | 600 | 75288…77090 |
| M.dispar-GS01_GM000309 | 50S ribosomal protein L2 | *rplB* | 282 | 385710…386558 |
| M.dispar-GS01_GM000316 | 50S ribosomal protein L14 | *rplN* | 122 | 389160…389528 |
| M.dispar-GS01_GM000328 | 30S ribosomal protein S13 | *rpsM* | 137 | 396630…397043 |
| M.dispar-GS01_GM000438 | Elongation factor Tu (EF-Tu) | *tuf* | 402 | 569477…570685 |
| M.dispar-GS01_GM000670 | DNA gyrase subunit B | *gyrB* | 648 | 874984…876930 |
| M.dispar-GS01_GM000726 | enolase | *eno* | 452 | 944014…945372 |
| M.dispar-GS01_GM000764 | 30S ribosomal protein S7 | *rpsG* | 156 | 991925…992395 |
| M.dispar-GS01_GM000765 | 30S ribosomal protein S12 | *rpsL* | 145 | 992450…992887 |
| M.dispar-GS01_GM000775 | 30S ribosomal protein S9 | *rpsI* | 132 | 1000364…1000762 |

a The information corresponded to *M. dispar* GS01. The listed 12 single-copy core genes can be detected in all 21 selected *Mycoplasma* strains.
